# Supplementary material
Source: PubMed Central journal article supplement (PMC8713651)
Supplement: ehp9044.smcontents.508.pdf [file ehp9044.smcontents.508.pdf]

**Note to readers with disabilities:** *EHP* strives to ensure that all journal content is accessible to all readers. However, some figures and Supplemental Material published in *EHP* articles may not conform to [508 standards](#) due to the complexity of the information being presented. If you need assistance accessing journal content, please contact [ehp508@niehs.nih.gov](mailto:ehp508@niehs.nih.gov). Our staff will work with you to assess and meet your accessibility needs within 3 working days.

### **Supplemental Material**

#### **Long-Term Exposure to Low-Level NO<sub>2</sub> and Mortality among the Elderly Population in the Southeastern United States**

Yaoyao Qian, Haomin Li, Andrew Rosenberg, Qiulun Li, Jeremy Sarnat, Stefania Papatheodorou, Joel Schwartz, Donghai Liang, Yang Liu, Pengfei Liu, and Lihua Shi

#### **Table of Contents**

**Table S1.** Summary statistics of Full cohort (N=13,590,387) and Below-WHO guidelines cohort (N=9,669,469) for area-level variables from 2000 to 2016, in seven southeastern U.S states.

**Table S2.** Estimated Hazard Ratio of Mortality (95% CI) associated with an Increase of 10 µg/m<sup>3</sup> in PM<sub>2.5</sub> Concentration or 10 ppb in O<sub>3</sub> Concentration in the Full Cohort (N = 13,590,387).

**Table S3.** Hazard Ratios of Mortality (95% CI) associated with an Increase of 10 ppb in NO<sub>2</sub> Concentration by Study Subgroups in Full Cohort (N = 13,590,387).

**Table S4.** Estimated Hazard Ratio of Mortality (95% CI) associated with an Increase of 10 ppb in NO<sub>2</sub> Concentration at different levels of confounding adjustment.

**Table S5.** The Hazard Ratio of Mortality (95% CI) associated with an Increase of 10 ppb in NO<sub>2</sub> Concentration by state.

**Table S6.** Descriptive characteristics of NO<sub>2</sub> and mortality cohort studies published from 2006-2021.

**Table S7.** Standard Errors Estimated before and after accounting for Spatial Dependence in both cohorts.

**Figure S1.** The map of major roadways in the southeastern US.

**Figure S2.** The spatial distribution of 17-year mean concentrations of annual NO<sub>2</sub> (ppb) at 1-km<sup>2</sup> grids in the southeastern US (2000-2016).

**Figure S3.** The standard deviations of 1-km<sup>2</sup> NO<sub>2</sub> concentrations (ppb) within ZIP code areas in the southeastern US in 2010.

**Figure S4.** The temporal trend of NO<sub>2</sub> concentrations in the southeastern US from 2000-2016.

**Figure S5.** The relationship between long-term exposure to NO<sub>2</sub> and all-cause mortality, derived from single pollutant models with adjustment of age at entry (5-year categories), gender (female, male), race (White, Black, and other), Medicaid eligibility, calendar-year, summer and winter mean temperature, median home value, median household income, population density, the proportion of owner-occupied housing units, the percentage of Black and Hispanic populations, education level, population below poverty level, body mass index, and the proportion of those who were ever smokers. The descriptive statistics for these variables were provided in Table 1 and Table S1. Shaded areas indicate the 95% confidence bands.
